# Supplementary material for: A magnetic microneedle to isolate single immunomagnetically labeled cells
Source: Royal Society of Chemistry journal article supplement (doi:10.1039/d3lc00920c), 2023-12-06
Supplement: d3lc00920c1.pdf [file d3lc00920c1.pdf]

## Supplementary

| Cell line | Bead       | Success/attempt | Success percentage |
|-----------|------------|-----------------|--------------------|
| LNCaP     | Dynell     | 20/20           | 100%               |
|           | CellSearch | 20/20           | 100%               |
|           | Milteyni   | 20/20           | 100%               |
| PC3       | Dynell     | 20/20           | 100%               |
|           | CellSearch | 28/29           | 97%                |
|           | Milteyni   | 15/24           | 63%                |

Supplementary table S1; Number of attempts and success percentage for the pickup of LNCaP and PC3 using Dynell, CellSearch and Milteyni beads for magnetic labelling.

| N                     | Cells spiked | Recovered after enrichment | Pickup attempted | Successfully picked up | Successfully Transferred | Successfully Aspirated | Relocated in 2ul droplet | Confirmed single target cell |
|-----------------------|--------------|----------------------------|------------------|------------------------|--------------------------|------------------------|--------------------------|------------------------------|
| 1                     | 25           | 21                         | 17               | 17                     | 17                       | 16                     | 14                       | 13                           |
| 2                     | 19           | 15                         | 12               | 12                     | 12                       | 12                     | 12                       | 11                           |
| 3                     | 19           | 15                         | 15               | 15                     | 15                       | 15                     | 12                       | 12                           |
| Total                 | 63           | 51                         | 44               | 44                     | 44                       | 43                     | 38                       | 36                           |
| % of spiked cells     | 100%         | 81%                        | 70%              | 70%                    | 70%                      | 68%                    | 60%                      | 57%                          |
| % of recovered cells  |              | 100%                       | 86%              | 86%                    | 86%                      | 84%                    | 75%                      | 71%                          |
| % of attempted pickup |              |                            | 100%             | 100%                   | 100%                     | 98%                    | 86%                      | 82%                          |

Supplementary table S2; Number of LNCaP cells spiked into 7.5 mL blood samples as well as the number and percentage of recovered, picked up, transferred, relocated and confirmed to be single target cells.
